# Supplementary material for: Metformin inhibits proliferation and growth hormone secretion of GH3 pituitary adenoma cells
Source: PubMed Central journal article supplement (PMC5514928; doi:10.18632/oncotarget.16556), 2017-03-25
Supplement: oncotarget-08-37538-s001.pdf [file oncotarget-08-37538-s001.pdf]

# Metformin inhibits proliferation and growth hormone secretion of GH3 pituitary adenoma cells

## SUPPLEMENTARY MATERIAL

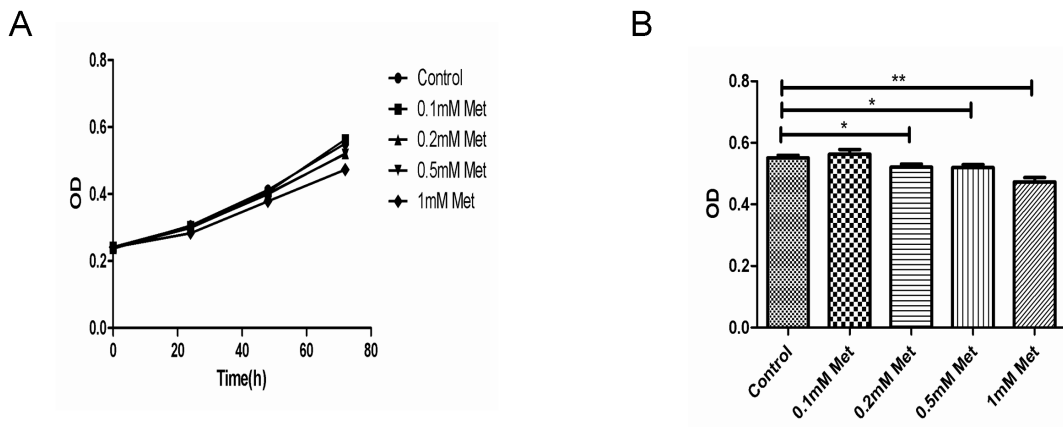

**Supplementary Figure 1: GH3 cells were incubated with metformin of lower concentrations.** (A) GH3 cells were incubated with different doses of metformin (0, 0.1, 0.2, 0.5 and 1 mM) and cell proliferation assay was performed daily from 0 to 72 hours. (B) GH3 cells were treated with metformin (0, 0.1, 0.2, 0.5 and 1 mM) for 72 hours, and cell proliferation assay was performed. The data were represented as means ± SEM; n=6. \*P < 0.05; \*\*P < 0.01.

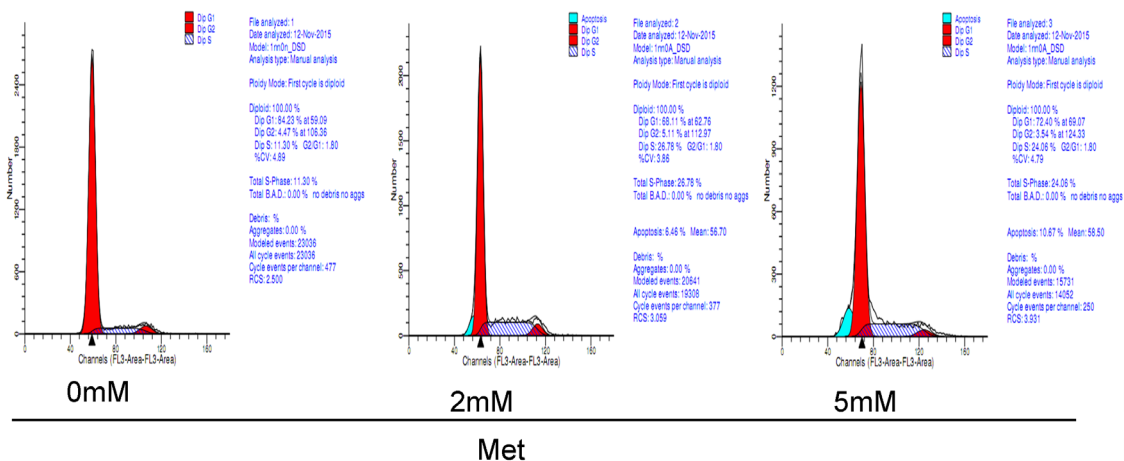

Supplementary Figure 2: GH3 cells were treated with metformin (0, 2 and 5 mM) for 48 h, and cell cycle distributions were analyzed using flow cytometry.

Supplementary Table 1: Clinical characters of 8 GH-PA patients

| Case | Age | Gender | Tumor size(cm) | Serum GH (ng/ml) | Serum IGF-1 (ng/ml) | Invasiveness |
|------|-----|--------|----------------|------------------|---------------------|--------------|
| 1    | 50  | F      | 1.5x1.8x1.9    | 54.8             | 1008                | No           |
| 2    | 66  | F      | 2.6x2.7x2.0    | 24.1             | 713                 | Yes          |
| 3    | 51  | F      | 2.2x2.4x3.3    | 15.5             | 370                 | Yes          |
| 4    | 37  | M      | 2.9x4.5x3.5    | 21.9             | 1013                | Yes          |
| 5    | 30  | M      | 1.0x1.2x0.8    | 39.8             | 762                 | No           |
| 6    | 28  | F      | 3.3x2.3x2.0    | 71.9             | 859                 | Yes          |
| 7    | 62  | F      | 0.5x0.7x1.0    | 26.6             | 520                 | No           |
| 8    | 53  | M      | 2.2x2.2x2.4    | 15.9             | 764                 | Yes          |

M: male; F: female.
